# Supplementary material for: Enhanced Expression of Alcohol Dehydrogenase I in Pichia pastoris Reduces the Content of Acetaldehyde in Wines
Source: MDPI journal article supplement (doi:10.3390/microorganisms12010038), 2023-12-25
Supplement: s1 [file s1]

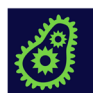

## Article

# Enhanced Expression of Alcohol Dehydrogenase I in *Pichia pastoris* Reduces the Content of Acetaldehyde in Wines

Kun Geng<sup>1,2</sup>, Ying Lin<sup>1,2</sup>, Xueyun Zheng<sup>3</sup>, Cheng Li<sup>4</sup>, Shuting Chen<sup>1,2</sup>, He Ling<sup>1,2</sup>, Jun Yang<sup>1,2</sup>, Xiangyu Zhu<sup>1,2</sup> and Shuli Liang<sup>1,2,\*</sup>

<sup>1</sup> School of Biology and Biological Engineering, South China University of Technology, Guangzhou 510006, China

<sup>2</sup> Guangdong Provincial Key Laboratory of Fermentation and Enzyme Engineering, South China University of Technology, Guangzhou 510006, China

<sup>3</sup> Key Laboratory of Fermentation Engineering of Ministry of Education, School of Biological Engineering and food, Hubei University of Technology, Wuhan 430068, China

<sup>4</sup> Department of Biology, Massachusetts Institute of Technology, Cambridge, MA 02139, USA

\* Correspondence: shuli@scut.edu.cn

## Supplementary File: The codon-optimized sequence of ADH1 (5'→3')

ATGTCTATTCCAGAACTCAAAAGGGAGTTATTTTTACGAATCACATGGAAAGTTGGAATACAAGGATATTC  
CAGTTCCTAAGCCAAAGGCTAACGAATTGTTGATTAAACGTTAAGTACTCAGGAGTTTGTCTACTGATCTGCA  
CGCTTGGCATGGAGATTGGCCATTGCCAGTTAAGTTGCCTTTGGTTGGAGGTCATGAAGGTGCTGGTGTGTTG  
TTGGTATGGGAGAAAACGTTAAGGGATGGAAGATTGGAGATTACGCTGGTATTAAGTGGTTGAACGGATCAT  
GTATGGCTTGTGAATACTGTGAATTGGGTAACGAATCAAACGTCCACATGCTGATTTGTCCGGTTACACTCA  
TGATGGTAGCTTTCAACAATACGCTACTGCTGATGCTGTTCAAGCTGCTCATATTCCACAAGGAAGTATTG  
GCTCAAGTTGCTCCAATTTTGTGTGCTGGTATTACTGTTTACAAGGCTTTGAAGTCCGCTAACTTGATGGCTGG  
ACATTGGGTGCTATTTTCAGGAGCTGCTGGAGGATTGGGCTCCTTGGCTGTTCAATACGCTAAGGCTATGGGT  
TACAGAGTTTTGGGTATTGATGGAGGTGAAGGTAAGGAAGAATTGTTTAGATCCATTGGAGGTGAAGTTTTTA  
TTGATTTTACTAAGGAAAAGGATATTGTTGGTGTGCTGTTTTGAAGGCTACTGATGGTGGTGTCTCATGGAGTTATT  
AACGTTTCCGTTTCAGAAGCTGCTATTGAAGCCTCCACTAGATACGTTAGAGCTAACGGAAGTACTGTTTTGG  
TTGGTATGCCTGCTGGTGTCTAAGTGTGTTCCGATGTTTTTAACCAAGTTGTTAAGTCCATTTCTATTGTTGGAT  
CTTACGTTGGTAACAGAGCTGATACTAGAGAGGCGTTGGATTTTTTTGCTAGAGGTTTGGTTAAGTCACCAATT  
AAGGTTGTTGGTTTGTCAACTTTGCCAGAAATTTACGAAAAGATGGAAAAGGGACAAATTGTTGGTAGATAC  
GTGTTGATACTTCTAAGTAA

**Supplementary Table S1.** Primers and their sequences used in this study. “-F” and “-R” indicate the forward and reverse primers, respectively.

| Primer             | Sequence (5'→3')                                            |
|--------------------|-------------------------------------------------------------|
| ADH1-N-His-BamHI-F | CGCGGATCCATGCATCATCATCATCATCTATTCTATTCCAGAACTCAAAA<br>GGGAG |
| ADH1-NotI-R        | AAGGAAAAAAGCGGCCGCTTACTTAGAAGTATC                           |
| ADH1-BamHI-F       | CGCGGATCCATGTCTATTCCAGAACTCAAAAGGGAG                        |
| ADH1-C-His-NotI-R  | TTGCGGCCGCTTAATGATGATGATGATGATGCTTAGAAGTATCAACAA<br>CG      |
| ADH1-N-His-EcoRI-F | CCGGAATTCATGCATCATCATCATCATCTATTCTATTCC                     |
| pHKA-ADH3-F        | GGATTTTGGTCATGAGATCAGATCTTCTGACGGTACTAGAGGAC                |
| pHKA-ADH3-R        | GATGATGATGATGATGCATGAATTCCGTAAAGTAAATAAGATAA                |

|        |                                |
|--------|--------------------------------|
| Copy-F | GCGCTCTGCTGAAGCCAGTTACCTTCGGAA |
| Copy-R | GGCAGTACCGGCATAACCAAGCCTATGCCT |

**Supplementary Table S2.** The reaction systems of the reduction in the contents of acetaldehyde in four groups of wine samples by ADH1 and GDH. Symbol “—” indicates no addition of the specific substances.

| Group | Wine sample (μL) | ADH1 (μL) | NADH (μL) | GDH (μL) | Glucose (μL) | ddH <sub>2</sub> O (μL) |
|-------|------------------|-----------|-----------|----------|--------------|-------------------------|
| 1     | 1400             | 300       | —         | —        | —            | 300                     |
| 2     | 1400             | 300       | 100       | —        | —            | 200                     |
| 3     | 1400             | 300       | 100       | 100      | —            | 100                     |
| 4     | 1400             | 300       | 100       | 100      | 100          | —                       |

**Supplementary Table S3.** Enzymatic activities of ADH1 in all strains of *Pichia pastoris*.

| Strain                                                 | Enzymatic activity (U/mL) |
|--------------------------------------------------------|---------------------------|
| GS115/pPIC9K (Methanol)                                | 14.24 ± 0.83              |
| GS115/pPIC9K (Ethanol)                                 | 8.65 ± 0.01               |
| GS115/pPIC9K- <i>ADH1</i> <sub>N-6×His</sub>           | 72.08 ± 3.12              |
| GS115/pPIC9K- <i>ADH1</i> <sub>C-6×His</sub>           | 36.04 ± 7.80              |
| GS115/pHKA- <i>ADH1</i> <sub>N-6×His</sub>             | 101.81 ± 3.12             |
| GS115/pHKA- <i>ADH1</i> <sub>N-6×His</sub> -2Copies    | 175.69 ± 4.68             |
| GS115/pHKAOXm- <i>ADH1</i> <sub>N-6×His</sub>          | 159.48 ± 15.05            |
| GS115/pHKAOXm- <i>ADH1</i> <sub>N-6×His</sub> -2Copies | 214.44 ± 5.63             |
| GS115/pHKAOXm- <i>ADH1</i> <sub>N-6×His</sub> -3Copies | 241.47 ± 9.49             |
| GS115/pHKADH3- <i>ADH1</i> <sub>N-6×His</sub>          | 23.25 ± 0.54              |

Strains GS115/pPIC9K (Ethanol) and GS115/pHKADH3-*ADH1*<sub>N-6×His</sub> are cultured with ethanol as the carbon source; GS115/pPIC9K (Methanol) and other strains are cultured with methanol as the carbon source.

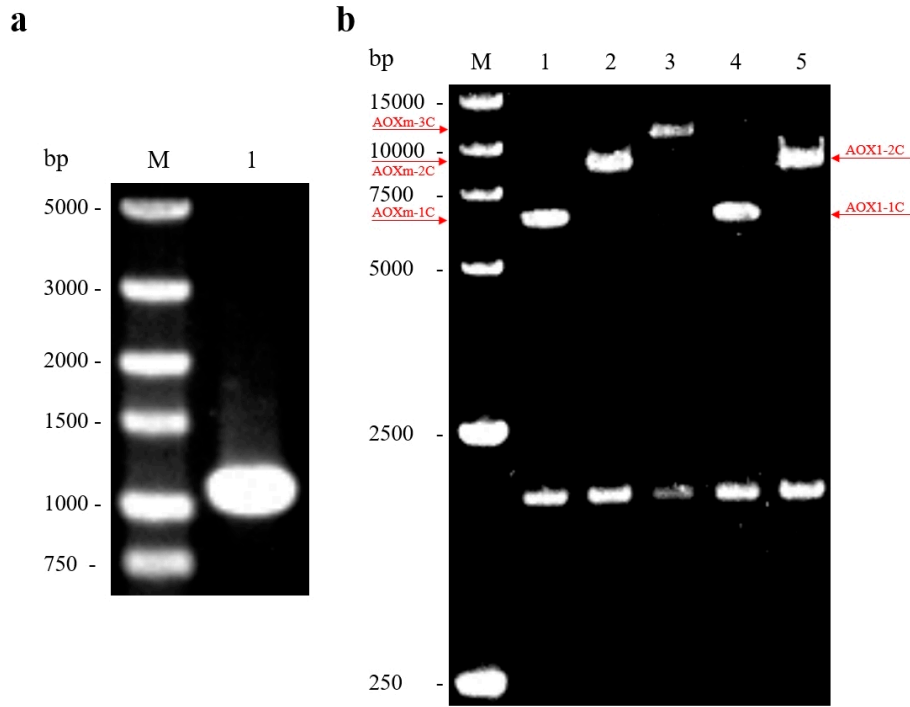

**Supplementary Figure S1.** PCR verification of *ADH1* and the double-enzyme digestion of plasmids. (a) PCR-amplification of *ADH1*<sub>N-6xHis</sub>. (b) Length of the segments of the digested plasmids with multicopy target genes. Lane M: the DNA marker; lanes 1–3 represent the segments of digested plasmids pHKAOXm-*ADH1*<sub>N-6xHis</sub>, pHKAOXm-*ADH1*<sub>N-6xHis</sub>-2Copies, and pHKAOXm-*ADH1*<sub>N-6xHis</sub>-3Copies, respectively; lanes 4 and 5 contain the segments of digested plasmids pHKA-*ADH1*<sub>N-6xHis</sub> and pHKA-*ADH1*<sub>N-6xHis</sub>-2Copies, respectively. The longer segment following double-enzyme digestion of each plasmid is marked with a red arrow.

### Construction of plasmids

Both pPIC9K-*ADH1*<sub>N-6xHis</sub> and pPIC9K-*ADH1*<sub>C-6xHis</sub> were constructed as follows: genes *ADH1*<sub>N-6xHis</sub> and *ADH1*<sub>C-6xHis</sub> were PCR-amplified using the primer pairs ADH1-N-His-BamHI-F/ADH1-NotI-R and ADH1-BamHI-F/ADH1-C-His-NotI-R, respectively. Then, these segments and the plasmid pPIC9K were digested with the restriction enzymes *Bam*HI and *Not*I. Finally, the digested segments were ligated to obtain the recombinant plasmids pPIC9K-*ADH1*<sub>N-6xHis</sub> and pPIC9K-*ADH1*<sub>C-6xHis</sub>.

Promoters *P*<sub>AOX1</sub>, *P*<sub>AOXm</sub>, and *P*<sub>ADH3</sub> were used to induce the expression of ADH1, with *P*<sub>AOX1</sub> and *P*<sub>AOXm</sub> inserted into the plasmid pHKA. The primers ADH1-N-His-EcoRI-F and ADH1-NotI-R were used to amplify the gene *ADH1*<sub>N-6xHis</sub>. Then, both plasmids pHKA and pHKAOXm and *ADH1*<sub>N-6xHis</sub> segments were digested by the restriction enzymes *Eco*RI and *Not*I, with the digested segments ligated to obtain the recombinant plasmids pHKA-*ADH1*<sub>N-6xHis</sub> and pHKAOXm-*ADH1*<sub>N-6xHis</sub>. The *P*<sub>ADH3</sub> segments were amplified based on the genome of *Pichia pastoris* GS115 using primers pHKA-ADH3-F and pHKA-ADH3-R. Then, the linearized plasmid pHKA-*ADH1*<sub>N-6xHis</sub>, without the promoter, was obtained after the digestion by restriction enzymes *Eco*RI and *Bgl*II. To summarize, the plasmid pHKADH3-*ADH1*<sub>N-6xHis</sub> was constructed by replacing the original promoter *P*<sub>AOX1</sub> with *P*<sub>ADH3</sub>.

Multicopy plasmids were constructed as follows: restriction enzymes *Bgl*II and *Bam*HI were used to digest the plasmids pHKA-*ADH1*<sub>N-6xHis</sub> and pHKAOXm-*ADH1*<sub>N-6xHis</sub> to obtain the expression cassettes, which were inserted into the single-copy plasmids pHKA-*ADH1*<sub>N-6xHis</sub> and pHKAOXm-*ADH1*<sub>N-6xHis</sub> predigested with *Bgl*II, respectively, to obtain the two-copy plasmids pHKA-*ADH1*<sub>N-6xHis</sub>-2Copies and pHKAOXm-*ADH1*<sub>N-6xHis</sub>-2Copies, respectively. Finally, the three-copy

plasmid pHKAOXm-*ADH1*<sub>N-6×His-3Copies</sub> was constructed using the similar approaches to that for the construction of the two-copy plasmids. The single expression cassettes were successfully inserted into the single-copy or two-copy plasmids due to the same sticky ends generated by *Bgl*III or *Bam*HI.

### Amplification of *ADH1* gene and double enzyme digestion of plasmids

The primers *ADH1*-N-His-EcoRI-F and *ADH1*-NotI-R were used to amplify the *ADH1* gene, which was 1,047 bp in length. and the resulting segments after digestion with *Eco*RI and *Not*I were confirmed (Supplementary Figure S1a). To determine the positive ligations of plasmids containing single or multicopy target genes with the promoters *P*<sub>AOXm</sub> or *P*<sub>AOX1</sub>, two restriction enzymes (*Bgl*III and *Xho*I) were used to digest these plasmids. The lengths of the *P*<sub>AOXm</sub> and *P*<sub>AOX1</sub> expression cassettes were 2,382 bp and 2,434 bp, respectively. After the digestion with *Bgl*III and *Xho*I, the fragments of the plasmid with the single expression cassette *P*<sub>AOXm</sub>-*ADH1* were 6,509 bp and 1,985 bp, the fragments of the plasmid with a two-copy expression cassette were 8,891 bp and 1,985 bp, and the fragments of the plasmid with a three-copy expression cassette were 11,273 bp and 1,985 bp, respectively. Similarly, the fragments of the plasmid with the single expression cassette *P*<sub>AOX1</sub>-*ADH1* were 6,561 bp and 1,985 bp, and the fragments of the plasmid with the two-copy *P*<sub>AOX1</sub>-*ADH1* were 8,995 bp and 1,985 bp, respectively (Supplementary Figure S1b).

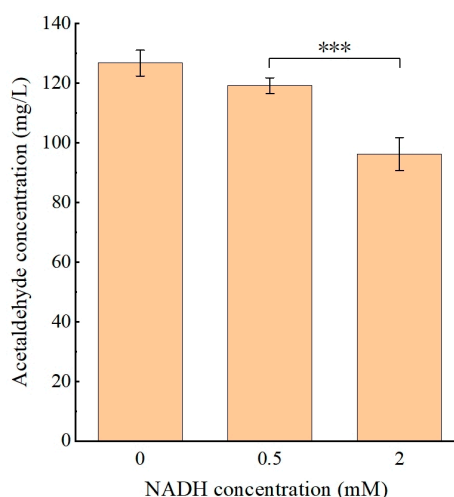

**Supplementary Figure S2.** Variations in the content of acetaldehyde in baijiu based on *ADH1*. Concentration of acetaldehyde in reaction systems is tested at 4 h. Each measurement of the content of acetaldehyde is repeated three times and expressed as the mean  $\pm$  standard deviation. The statistical significance is determined by Student's *t* test based on  $P < 0.01$  (\*\*).

### Reduced content of acetaldehyde in baijiu by *ADH1*

The baijiu samples obtained from Jiangji Winery were used to evaluate the effect of *ADH1* on the reduction of the acetaldehyde content. The acetaldehyde concentrations of the samples with the addition of 0.5 mM and 2 mM NADH were decreased after 4 h of *ADH1* catalysis, with the higher level of effect observed under the treatment of 2 mM NADH.
